# Supplementary material for: Structural and optical properties of phosphorous doped nanocrystalline silicon deposited using a VHF PECVD process for silicon heterojunction solar cells and optimization of a simple p–n junction cell using SCAP-1D tool
Source: Royal Society of Chemistry journal article supplement (doi:10.1039/d4ra02429j), 2024-01-01
Supplement: d4ra02429j1.pdf [file d4ra02429j1.pdf]

## Supplementary Information

### Structural and optical properties of phosphorous doped nanocrystalline silicon deposited using VHF PECVD process for silicon heterojunction solar cells and optimization of simple p-n junction cell using SCAP-1D tool

Vijay Kumar Gill,<sup>a</sup> Sucheta Juneja,<sup>\*b</sup> Shiv Kumar Dixit,<sup>\*a</sup> Shruti Vashist,<sup>a</sup> and Sushil kumar<sup>b</sup>

<sup>a</sup>Department of Electronics and Communication Engineering, Manav Rachna University, Aravalli Hills, Faridabad, Haryana – 121004, India.

<sup>b</sup>CSIR Network of Institutes for Solar Energy, CSIR– National Physical Laboratory, Dr. K.S. Krishnan Marg, New Delhi 110012, India.

\*Corresponding authors: [shivkumardixit.7@gmail.com](mailto:shivkumardixit.7@gmail.com) , [suchetajuneja@gmail.com](mailto:suchetajuneja@gmail.com)

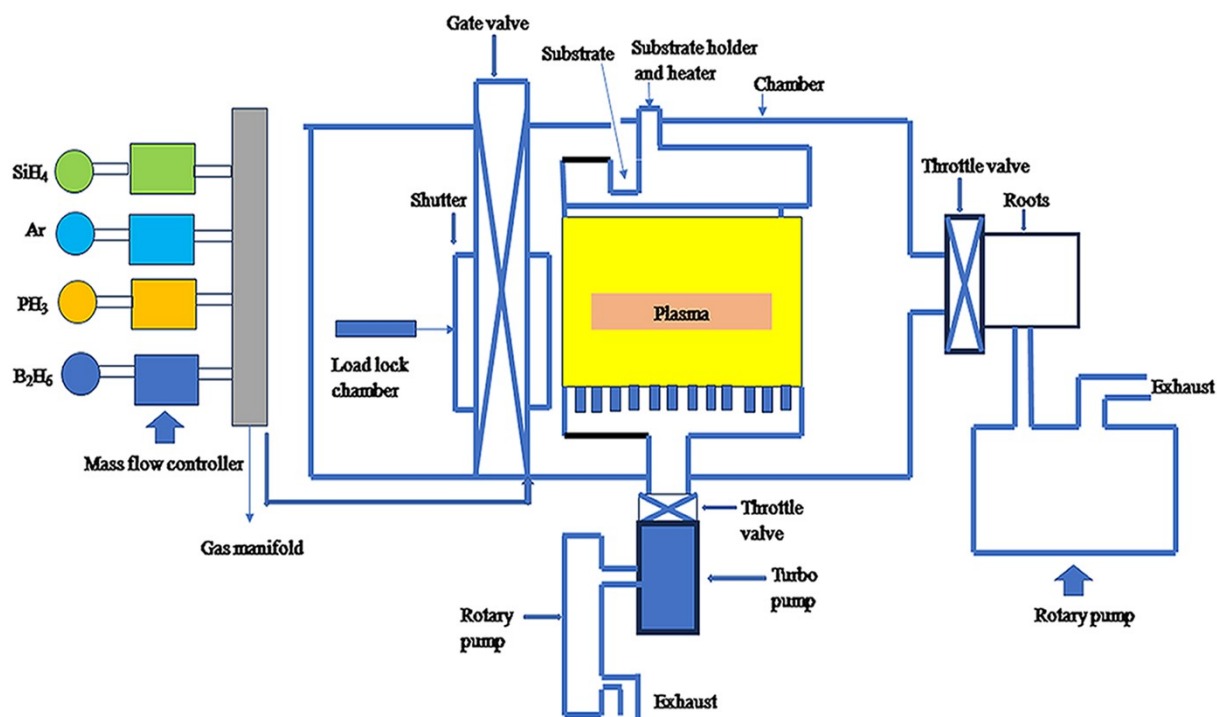

**Figure S1.** Schematic of PECVD system

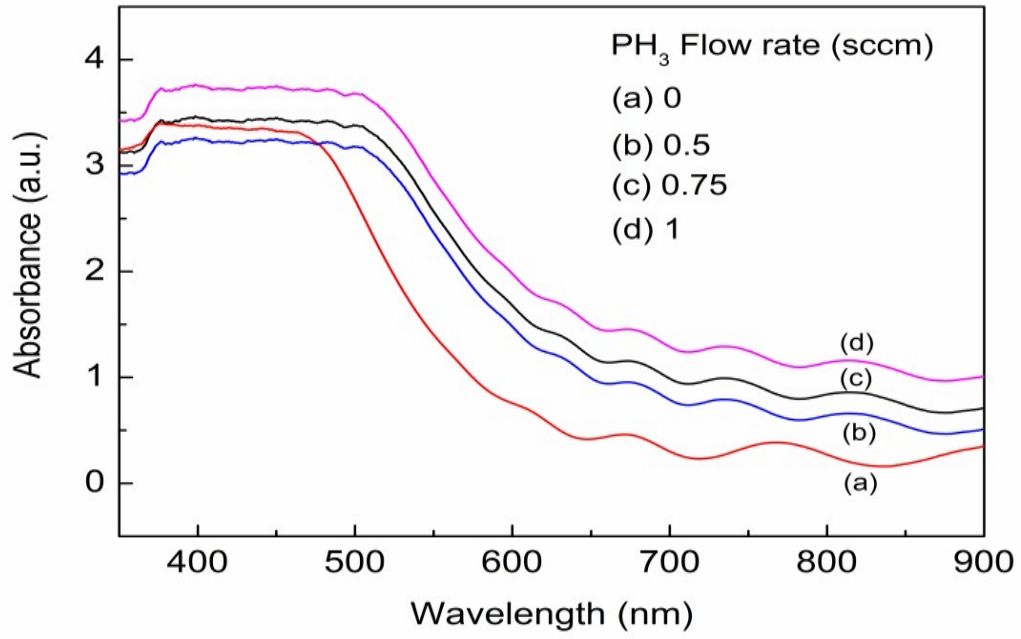

**Figure S2.** Absorption spectra of n type nc-Si:H films grown at different PH<sub>3</sub> flow rates (a) 0.0 (b) 0.5 (c) 0.75 and (d) 1 sccm
